# Supplementary material for: Improved binding and stability in Si/CNT hybrid nanostructures via interfacial functionalization: a first-principles study
Source: Royal Society of Chemistry journal article supplement (doi:10.1039/c3ra40340h), 2013-01-01
Supplement: c3ra40340h.pdf [file c3ra40340h.pdf]

## Electronic Supplementary Information

# Improved Binding and Stability in Si/CNT Hybrid Nanostructures via Interfacial Functionalization: a First-Principles Study

Vadym V. Kulish,<sup>a</sup> Man-Fai Ng,<sup>\*b</sup> Oleksandr I. Malyi,<sup>a</sup> Ping Wu,<sup>c</sup> and Zhong Chen<sup>\*a</sup>

<sup>a</sup> School of Materials Science and Engineering, Nanyang Technological University, 50 Nanyang Avenue, Singapore 639798, Singapore;

<sup>b</sup> Institute of High Performance Computing, 1 Fusionopolis Way, #16-16 Connexis, Singapore 138632, Singapore;

<sup>c</sup> Singapore University of Technology and Design, 20 Dover Drive, Singapore 138682, Singapore;  
E-mails: ngmf@ihpc.a-star.edu.sg (M.-F. N.), aszchen@ntu.edu.sg (Z.C.)

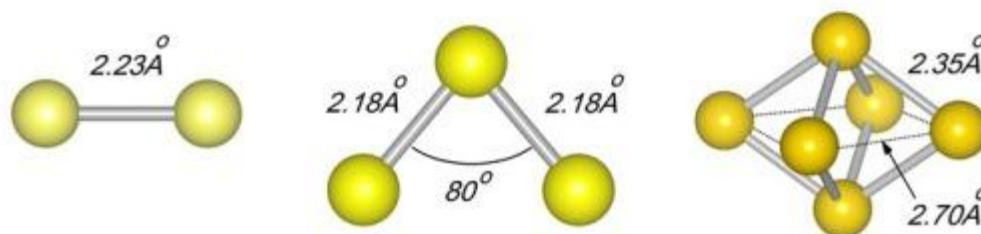

Figure S1. Initial structures of Si<sub>2</sub>, Si<sub>3</sub> and Si<sub>6</sub> clusters

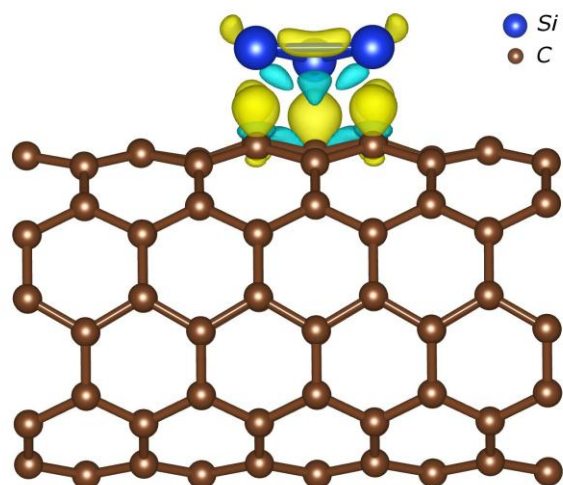

Figure S2. Contour plot of charge-density difference in Si<sub>3</sub>/CNT nanostructure (Configuration Si<sub>3</sub>-Par). Yellow color indicates positive regions (charge accumulation), while blue – negative (charge depletion)

The transferred electrons are mainly accumulated at the region of Si-C bonds. Note the charge accumulation on Si-Si bond, which is newly formed when Si<sub>3</sub> changed its shape from isosceles to equilateral triangle.
